# Supplementary material
Source: PubMed Central journal article supplement (PMC4275066)
Supplement: NIHMS649503-supplement-Supplemental_Data.pdf [file NIHMS649503-supplement-Supplemental_Data.pdf]

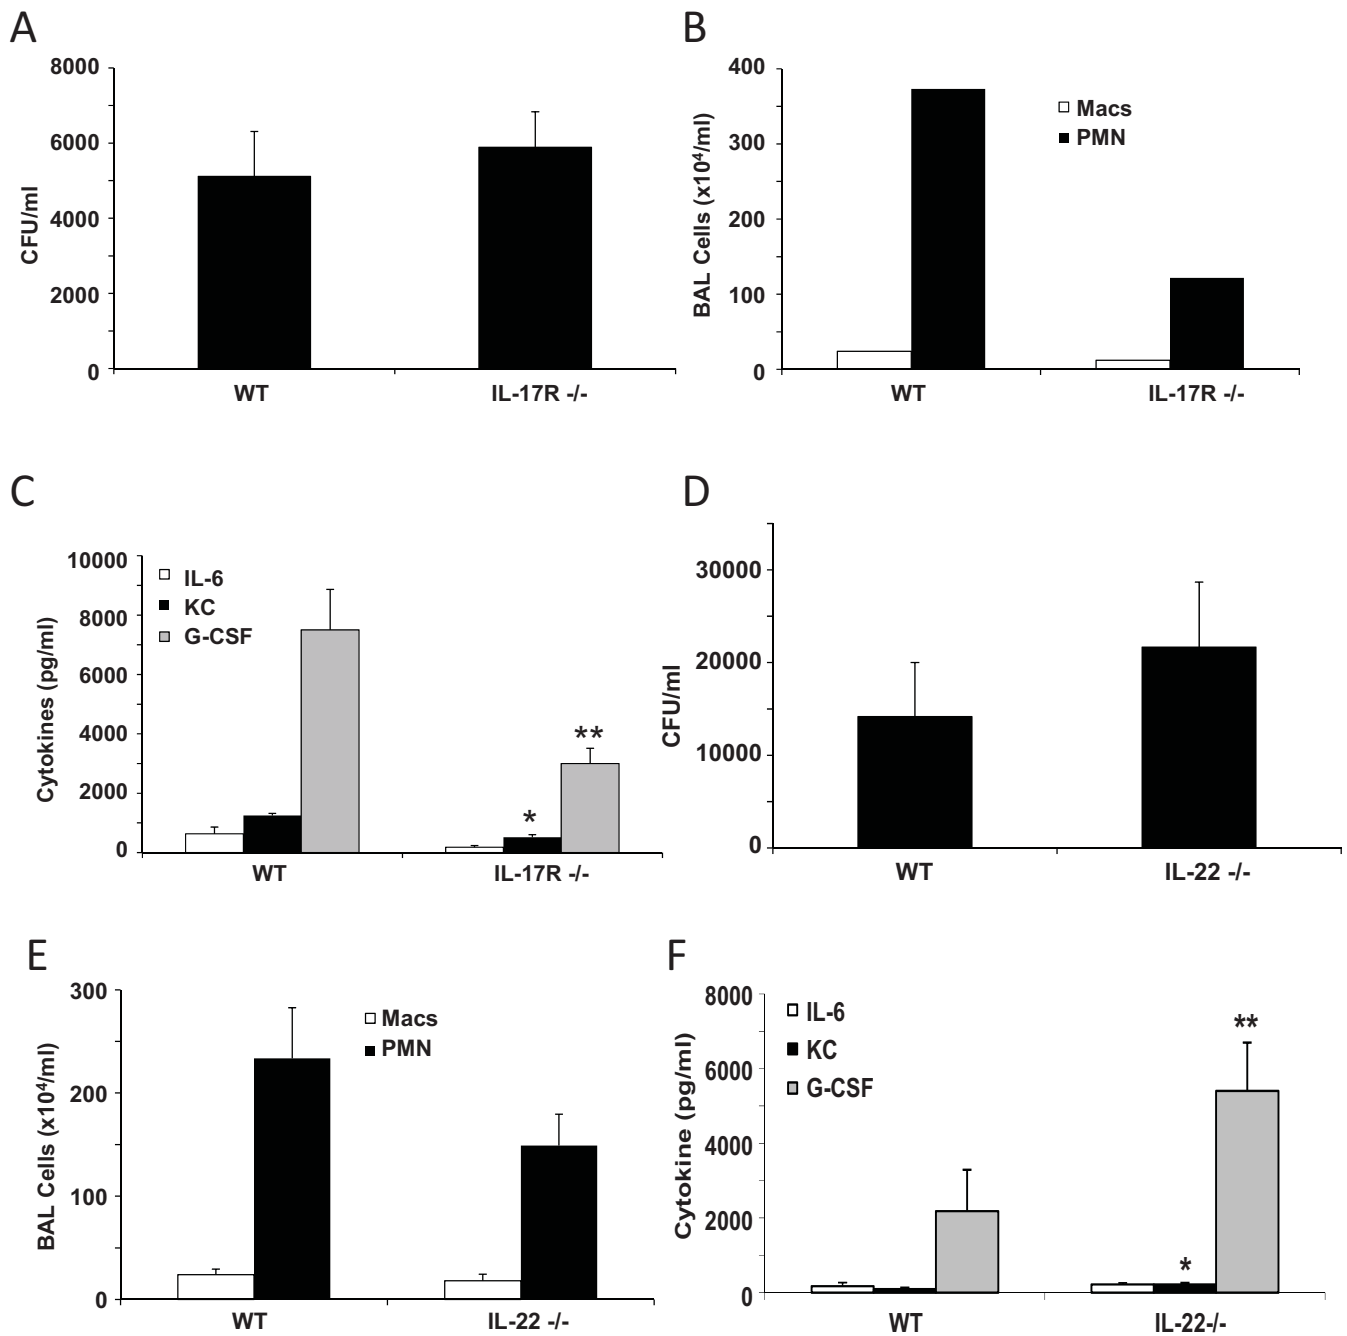

Supplemental Figure 1 – Impact of T<sub>H</sub>17 cytokine deletion on *S. aureus* pneumonia. C57BL/6 (WT), IL-17R<sup>-/-</sup>, or IL-22<sup>-/-</sup> mice were challenged with 10<sup>8</sup> cfu *S. aureus* for 24 (A,D) or 48 (B,C,E,F) hours. A,D - Data represent bacterial colony counts in the cranial lobe of the right lung (n=6,4 respectively). B,E – lavage cell differential cell counts (n=4). C,F – T<sub>H</sub>17 induced cytokines in lung homogenate (n=4). All experiments were repeated once, representative data are presented. \* p < 0.05, \*\* p < 0.10 versus WT

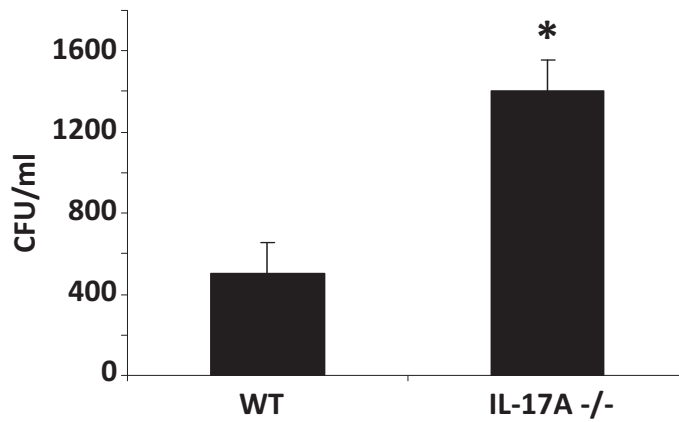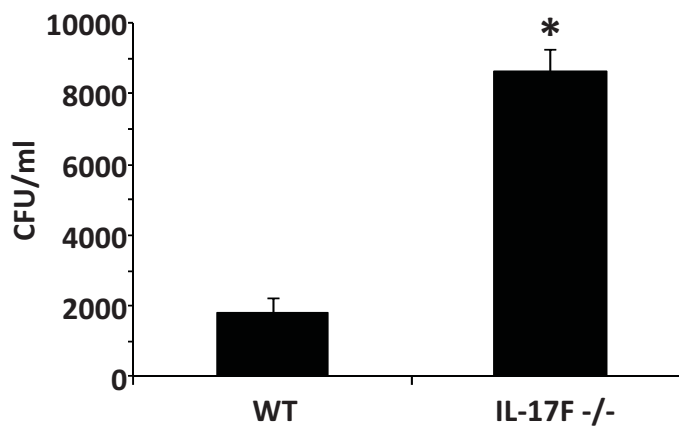

Supplemental Figure 2 - IL-17 is required for efficient clearance of *S. aureus* pneumonia. C57BL/6 (WT), IL-17A -/-, or IL-17F -/- mice were challenged with  $10^8$  cfu *S. aureus* for 48 hours (n=4), all experiments were repeated once, representative data are presented. Data reflect bacterial colony counts in the cranial lobe of the right lung. \* p < 0.05 versus WT

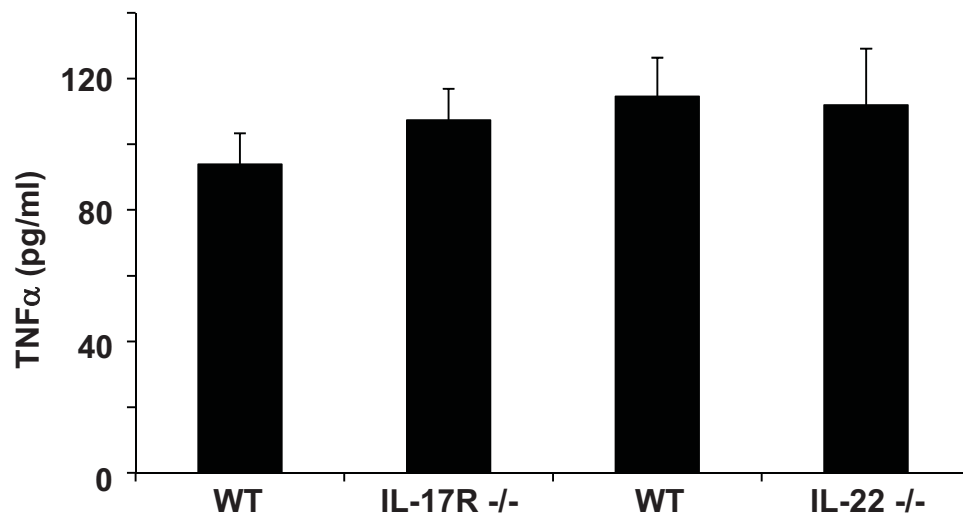

Supplemental Figure 3 - *S. aureus* induced TNF $\alpha$  production is unaltered in IL-17R -/- or IL-22 -/- mice. C57BL/6 (WT), IL-17R -/-, or IL-22 -/- mice were challenged with  $10^8$  cfu *S. aureus* for 24 hours (n=6 IL-17R -/-, 4 IL-22 -/-), all experiments were repeated once, representative data are presented. Data depict TNF $\alpha$  protein levels in whole lung homogenate.

A

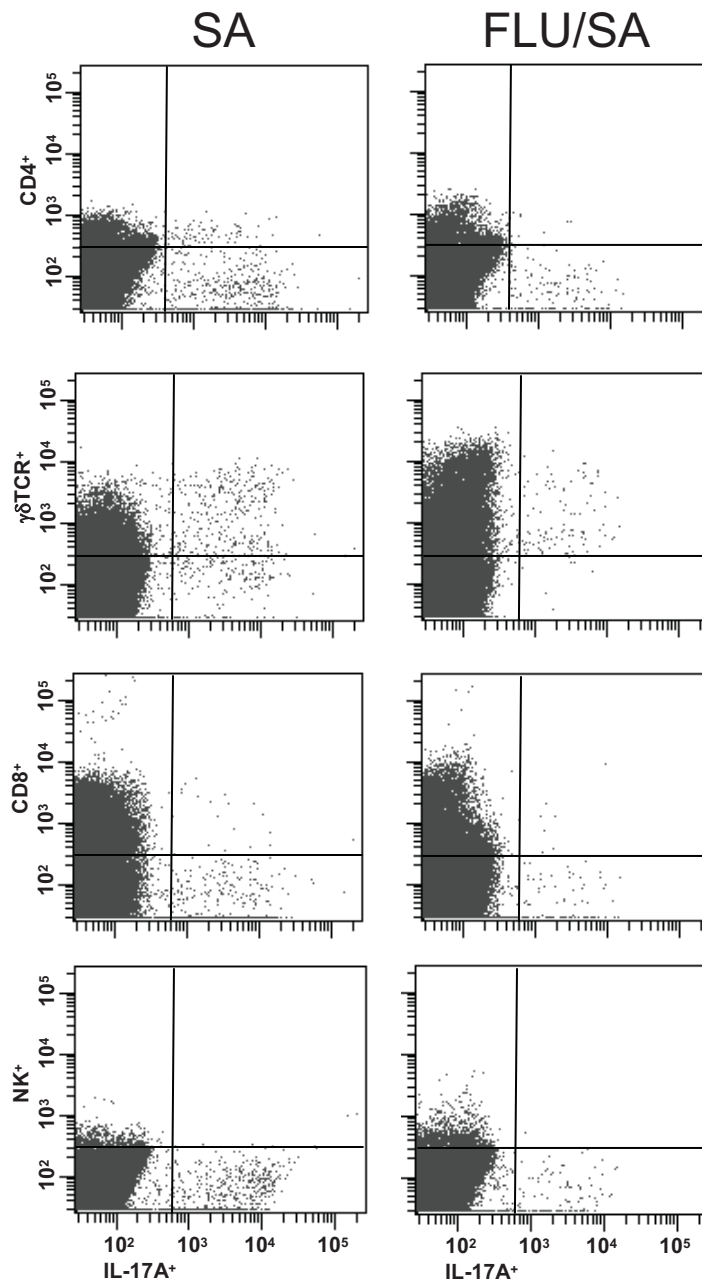

Supplemental Figure 4 – Influenza A infection inhibits CD4+ and  $\gamma\delta$  T cell expression of IL-17A. C57BL/6 mice were infected with 100 pfu of Influenza A PR/8/34 or vehicle for 6 days, mice were then challenged with  $10^8$  cfu *S. aureus* for 24 hours (n=4), all experiments were repeated once, representative data are presented. A – flow cytometry plot for T cell surface marker staining and IL-17A intracellular staining. Cells in the upper right quadrant are double positive cells. B – quantification of the percent double positive cells. \*\* p < 0.10 versus SA

B

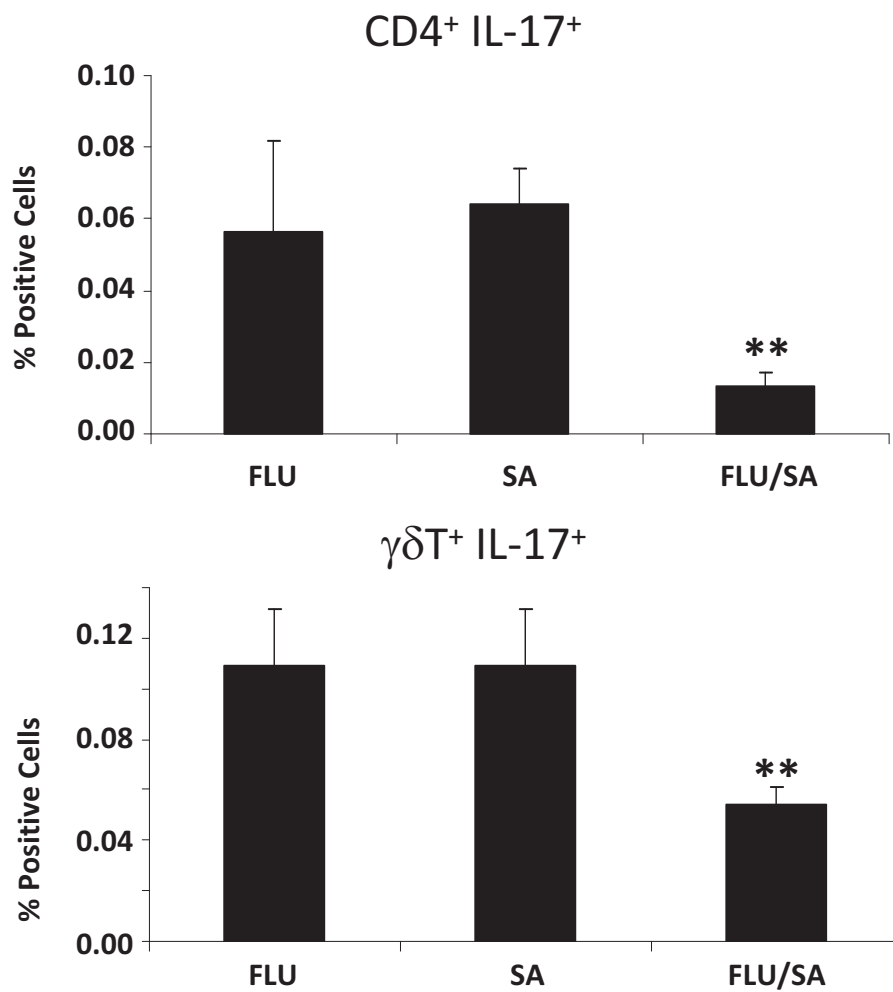

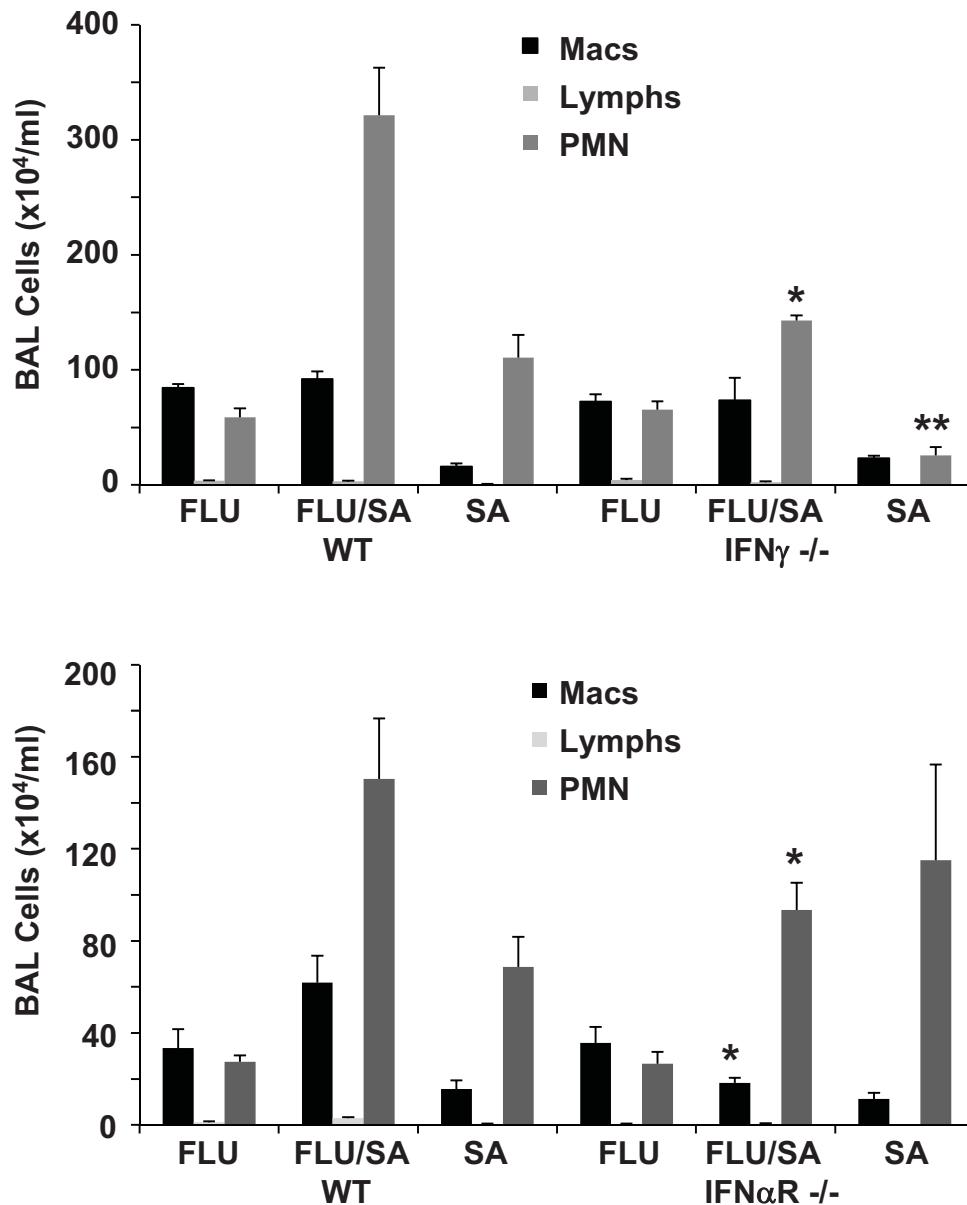

Supplemental Figure 5 – Attenuation of type I or II interferon signaling inhibits Influenza, *S. aureus* induced inflammation. C57BL/6, IFN $\alpha$ R<sup>-/-</sup>, or IFN $\gamma$ <sup>-/-</sup> mice were infected with 100 pfu of Influenza A PR/8/34 or vehicle for 6 days, mice were then challenged with 10<sup>8</sup> cfu *S. aureus* for 24 hours (n=4), all experiments were repeated once, representative data are presented. Data represent total lavage cell counts. \* p < 0.05 versus WT FLU/SA, \*\* p < 0.05 versus WT SA
